# Supplementary material for: Modeling Group B Streptococcus and Blood-Brain Barrier Interaction by Using Induced Pluripotent Stem Cell-Derived Brain Endothelial Cells
Source: PubMed Central journal article supplement (PMC5663983; doi:10.1128/msphere.00398-17), 2017-11-01

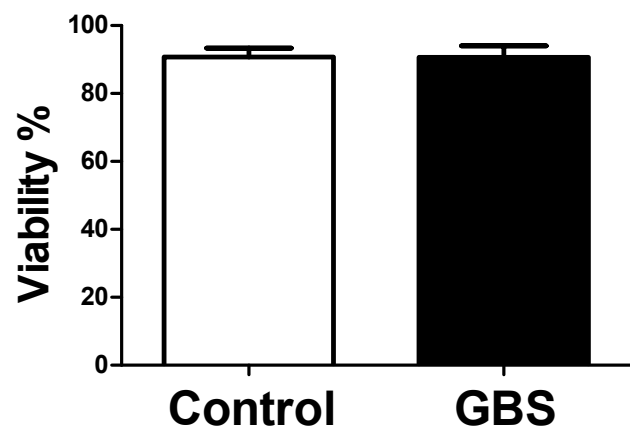

Supplement: sph005172391sf3.pdf [file sph005172391sf3.pdf]
